# Supplementary material
Source: PubMed Central journal article supplement (PMC3691102)
Supplement: NIHMS467343-supplement-supplement_1.pdf [file NIHMS467343-supplement-supplement_1.pdf]

Supplemental Table 1. Unadjusted Odds Ratios of Hospitalizations for ACSC and Non-ACSC Among Community-Dwelling Dementia Patients (N=1,186)

|                                        | ACSC Hospitalizations |               | Non-ACSC Hospitalizations |               |
|----------------------------------------|-----------------------|---------------|---------------------------|---------------|
|                                        | Unadjusted            |               | Unadjusted                |               |
|                                        | Odds Ratio            | 95% CI        | Odds Ratio                | 95% CI        |
| <b>County rurality</b>                 |                       |               |                           |               |
| Rural (non-core)                       | 1.99**                | (1.21 - 3.25) | 1.4                       | (0.93 - 2.10) |
| Micropolitan                           | 0.99                  | (0.60 - 1.66) | 1.08                      | (0.73 - 1.61) |
| Small Metropolitan                     | 0.81                  | (0.54 - 1.21) | 0.84                      | (0.61 - 1.14) |
| Large Metropolitan (reference)         |                       |               |                           |               |
| <b>Predisposing characteristics</b>    |                       |               |                           |               |
| CG age in years                        | 0.98**                | (0.96 - 0.99) | 0.99                      | (0.98 - 1.00) |
| CG Race                                |                       |               |                           |               |
| White (reference)                      |                       |               |                           |               |
| African-American                       | 1.29                  | (0.84 - 2.00) | 1.13                      | (0.81 - 1.57) |
| Relationship to care-recipient         |                       |               |                           |               |
| CG is wife (reference)                 | 0.54*                 | (0.31 - 0.94) | 0.68                      | (0.41 - 1.12) |
| CG is daughter or sister               |                       |               |                           |               |
| CG education in years                  | 0.96                  | (0.89 - 1.03) | 0.99                      | (0.94 - 1.04) |
| CR age in years                        | 1.03                  | (1.00 - 1.07) | 1.02                      | (1.00 - 1.04) |
| <b>CR medical need characteristics</b> |                       |               |                           |               |
| ADL limitations                        | 1.22**                | (1.15 - 1.29) | 1.09**                    | (1.05 - 1.13) |
| Behavioral disturbance                 | 1.02*                 | (1.00 - 1.03) | 1.02**                    | (1.01 - 1.03) |
| Charlson comorbidity index             | 1.23**                | (1.13 - 1.33) | 1.12**                    | (1.04 - 1.20) |
| Count of comorbid conditions           | 1.23**                | (1.15 - 1.31) | 1.10**                    | (1.05 - 1.15) |
| <b>Enabling characteristics</b>        |                       |               |                           |               |
| CG perceived financial adequacy        | 0.84                  | (0.61 - 1.14) | 0.76*                     | (0.60 - 0.95) |
| CR health insurance                    |                       |               |                           |               |

|                                               |        |               |        |               |
|-----------------------------------------------|--------|---------------|--------|---------------|
| Any private or Medicaid                       | 0.78   | (0.50 - 1.23) | 1.19   | (0.88 - 1.60) |
| Medicare only                                 | 1.16   | (0.48 - 2.80) | 1.99*  | (1.08 - 3.64) |
| Medicare + VA                                 | 1.05   | (0.62 - 1.76) | 1.21   | (0.87 - 1.67) |
| VA only (reference)                           |        |               |        |               |
| CG instrumental social support                | 1.00   | (0.98 - 1.02) | 0.98*  | (0.97 - 1.00) |
| CG emotional social support                   | 0.99   | (0.96 - 1.03) | 0.96** | (0.93 - 0.99) |
| CG limitations from comorbidities             | 1.03   | (0.99 - 1.07) | 1.02   | (0.99 - 1.06) |
| CG CES-D                                      | 1.01   | (0.97 - 1.05) | 1.01   | (0.98 - 1.04) |
| <b>County-level Enabling Indicators</b>       |        |               |        |               |
| Primary care shortage area                    |        |               |        |               |
| Yes                                           | 1.24   | (0.85 - 1.82) | 1.07   | (0.80 - 1.43) |
| No (reference)                                |        |               |        |               |
| Community health clinic in county             |        |               |        |               |
| Yes                                           | 0.57** | (0.40 - 0.80) | 0.93   | (0.69 - 1.25) |
| No (reference)                                |        |               |        |               |
| Distance to nearest VA medical center (miles) | 1.01*  | (1.00 - 1.02) | 1.01   | (.99 - 1.01)  |

---

\* significant at 5%; \*\* significant at 1%

ACSH=Hospitalization for an Ambulatory Care Sensitive Condition; N/A = Not Applicable; CG=caregiver; CR=care-recipient; VA=Veterans Administration; CES-D=Center for Epidemiologic Studies Depression Scale;
